# Supplementary material for: High mRNA expression of splice variant SYK short correlates with hepatic disease progression in chemonaive lymph node negative colon cancer patients
Source: PubMed Central journal article supplement (PMC5619807; doi:10.1371/journal.pone.0185607), 2017-09-28
Supplement: pone.0185607.s005.pdf [file pone.0185607.s005.pdf]

**S1 Table. Gene assays used to measure mRNA expression of *SYK*, *SYK* splice variants and reference genes, and generate EMT, infiltrate and GGI indices.**

| INDEX            | Gene Symbol    | Gene Name                                            | qPCR detection method | Assay ID ThermoFisher Scientific | F sequence             | R sequence                 |
|------------------|----------------|------------------------------------------------------|-----------------------|----------------------------------|------------------------|----------------------------|
| SYK total        | <i>SYK (T)</i> | Spleen Tyrosine Kinase                               | Taqman                | Hs00374292_m1                    |                        |                            |
| SYK short        | <i>SYK (S)</i> | Spleen Tyrosine Kinase                               | Taqman                | Hs00177369_m1                    |                        |                            |
| SYK long         | <i>SYK (L)</i> | Spleen Tyrosine Kinase                               | Taqman                | Hs00895384_m1                    |                        |                            |
| EMT              | <i>BGN</i>     | biglycan                                             | Taqman                | Hs00959141_g1                    |                        |                            |
| EMT              | <i>CDH2</i>    | cadherin 2, type 1, N-cadherin (neuronal)            | Taqman                | Hs00983062_m1                    |                        |                            |
| EMT              | <i>FAP</i>     | fibroblast activation protein, alpha                 | Taqman                | Hs00990806_m1                    |                        |                            |
| EMT              | <i>FN1</i>     | fibronectin 1                                        | Taqman                | Hs00277509_m1                    |                        |                            |
| EMT              | <i>INHBA</i>   | inhibin, beta A                                      | Taqman                | Hs01081598_m1                    |                        |                            |
| EMT              | <i>EPCAM</i>   | tumor-associated calcium signal transducer 1         | SYBR                  |                                  | AGTTTGCGGACTGCACTTCA   | AATACTCGTGATAAAATTTGGATCCA |
| EMT              | <i>ESR1</i>    | estrogen receptor 1                                  | SYBR                  |                                  | ATCCTACCAGACCCTTCAGTG  | GCCAGACGAGACCAATCATC       |
| EMT              | <i>ESR2</i>    | estrogen receptor 2 (ER beta)                        | SYBR                  |                                  | CATGCTCCTGGCAACTACTTC  | GCTCTTGGCAATCACCCAAC       |
| EMT              | <i>IGF1</i>    | insulin-like growth factor 1 (somatomedin C)         | SYBR                  |                                  | TGGTGGATGCTCTTCAGTTC   | GACAGAGCGAGCTGACTTG        |
| EMT              | <i>IGF2</i>    | insulin-like growth factor 2 (somatomedin A)         | SYBR                  |                                  | GCGGCTTCTACTTCAGCAG    | CAGGTGCATATTGGAAGAAC       |
| EMT              | <i>TGFB1</i>   | transforming growth factor, beta 1                   | SYBR                  |                                  | GCCCTGGACACCAACTATTG   | CGTGTCCAGGCTCCAATG         |
| EMT              | <i>VIM</i>     | vimentin                                             | SYBR                  |                                  | CAGATTCAGGAACAGCATGTC  | TCAGAGAGGTCAGCAAAGTTG      |
| EMT & Infiltrate | <i>VEGFA</i>   | vascular endothelial growth factor A                 | Taqman                | Hs00900055_m1                    |                        |                            |
| Infiltrate       | <i>PTPRC</i>   | protein tyrosine phosphatase, receptor type, C, CD45 | Taqman                | Hs00236304_m1                    |                        |                            |
| Reference gene   | <i>HMBS</i>    | hydroxymethylbilane synthase                         | SYBR                  |                                  | CATGTCTGGTAACGGCAATG   | GTACGAGGCTTTCAATGTTG       |
| Reference gene   | <i>HPRT1</i>   | hypoxanthine phosphoribosyltransferase 1             | SYBR                  |                                  | TATTGTAATGACCAGTCAACAG | GGTCTTTTCACCAGCAAG         |
| Reference gene   | <i>TBP</i>     | TATA-box binding protein                             | SYBR                  |                                  | TTCGGAGAGTTCTGGGATTG   | ACGAAGTGAATGGTCTTTAG       |
