# Supplementary material for: High mRNA expression of splice variant SYK short correlates with hepatic disease progression in chemonaive lymph node negative colon cancer patients
Source: PLoS One. 2017 Sep 28;12(9):e0185607. doi: 10.1371/journal.pone.0185607 (PMC5619807; doi:10.1371/journal.pone.0185607)
Supplement: S1 Individual Patient Data — (XLSX) [file pone.0185607.s004.xlsx]

## Sheet: Sheet1
S1 Individual patient data. Colon tumor sample overview, clinical characteristics and expression levels of SYK(T), SYK(S) and SYK(L).
Sample ID	Gender	Age	Stage	T	N	Tumor grade	Location	MSI status	SYK(T)	SYK(S)	SYK(L)
1	male	79.5	Stage II	T3	N0 ≥ N10 lymph nodes	moderate	Right	MSI	-3.74	-5.22	-4
2	male	75.4	Stage I	T2	N0 < N10 lymph nodes	moderate	Left	MSS	-4.21	-4.28	-4.64
3	female	59.3	Stage I	T2	N0 ≥ N10 lymph nodes	moderate	Right	MSI	-3.88	-5.2	-4.7
4	male	62.5	Stage II	T3	N0 ≥ N10 lymph nodes	poor	Left	MSS	-4.91	-6.59	-5.13
5	male	59.4	Stage III	T2	N1	moderate	Left	MSS	-4.91	-6.2	-5.8
6	male	58.5	Stage III	T3	N2	poor	Right	MSS	-4.58	-4.73	-5.64
7	male	63.8	Stage III	T2	N1	good	Right	MSS	-3.85	-4.11	-4.68
8	male	61.7	Stage I	T2	N0 < N10 lymph nodes	poor	Left	MSS	-4.61	-5.37	-5.19
9	female	59.7	Stage II	T3	N0 ≥ N10 lymph nodes	moderate	Right	MSS	-4.37	-5.37	-4.9
10	female	57.1	Stage I	T2	N0 < N10 lymph nodes	good	Left	MSS	-4.48	-5.31	-4.7
11	male	69.1	Stage I	T2	N0 < N10 lymph nodes	moderate	Left	MSS	-4.3	-4.91	-5.15
12	male	65	Stage III	T3	N1	moderate	Left	MSS	-4.47	-4.7	-5.32
13	male	60.7	Stage III	T3	N2	moderate	Left	MSS	-3.9	-4.79	-4.65
14	male	66.4	Stage III	T3	N2	moderate	Left	MSS	-4.59	-5.69	-5.05
15	female	65.7	Stage III	T3	N1	moderate	Right	MSS	-4.26	-5.44	-4.77
16	female	77.2	Stage II	T3	N0 ≥ N10 lymph nodes	moderate	Right	MSS	-3.47	-4.11	-3.89
17	male	64.7	Stage II	T3	N0 ≥ N10 lymph nodes	moderate	Right	MSI	-4.3	-4.84	-4.54
18	male	62.3	Stage I	T2	N0 ≥ N10 lymph nodes	moderate	Left	MSS	-4.69	-5.62	-4.81
19	female	64.8	Stage III	T3	N2	moderate	Right	MSS	-3.69	-3.65	-4.86
20	male	65.7	Stage II	T3	N0 ≥ N10 lymph nodes	poor	Right	MSS	-3.11	-3.77	-3.6
21	male	75.2	Stage I	T2	N0 ≥ N10 lymph nodes	moderate	Left	MSS	-4.03	-4.21	-4.62
22	female	75	Stage I	T2	N0 ≥ N10 lymph nodes	moderate	Right	MSS	-4.55	-5.04	-5.12
23	female	65.4	Stage II	T3	N0 < N10 lymph nodes	poor	Left	MSS	-3.65	-3.16	-4.92
24	male	76.9	Stage III	T3	N1	unknown	Right	MSS	-3.67	-3.87	-4.75
25	female	59.3	Stage III	T3	N2	poor	Right	MSI	-6.27	-9.63	-6.27
26	female	80.4	Stage II	T3	N0 ≥ N10 lymph nodes	moderate	Right	MSI	-5.82	-9.97	-5.78
27	male	80.9	Stage II	T3	N0 ≥ N10 lymph nodes	moderate	Right	MSI	-4.45	-5.05	-4.7
28	female	61.2	Stage II	T3	N0 ≥ N10 lymph nodes	moderate	Left	MSS	-2.09	-5.2	-1.97
29	male	56.3	Stage III	T3	N1	moderate	Left	MSS	-3.04	-3.31	-3.84
30	female	70.2	Stage II	T3	N0 ≥ N10 lymph nodes	moderate	Right	MSS	-4.32	-4.48	-5.07
31	female	75.9	Stage II	T3	N0 ≥ N10 lymph nodes	moderate	Left	MSS	-2.29	-2.02	-3.44
32	female	56.9	Stage II	T3	N0 ≥ N10 lymph nodes	moderate	Left	MSS	-3.27	-3.57	-4.13
33	female	73.7	Stage III	T3	N1	moderate	Left	MSS	-3.48	-3.69	-4.57
34	male	61.6	Stage I	T2	N0 < N10 lymph nodes	moderate	Right	MSS	-3.43	-3.71	-3.99
35	female	67.4	Stage II	T3	N0 < N10 lymph nodes	moderate	Right	MSI	-4.52	-5.57	-4.99
36	female	62.3	Stage III	T3	N1	moderate	Right	MSI	-4.13	-5.77	-4.48
37	male	81.2	Stage II	T3	N0 ≥ N10 lymph nodes	moderate	Left	MSS	-4.78	-5.48	-4.83
38	male	69	Stage III	T3	N2	moderate	Left	MSS	-4.62	-5.41	-5.49
39	female	73.2	Stage III	T2	N1	moderate	Right	MSS	-4.34	-4.69	-5.52
40	female	69.5	Stage III	T3	N2	moderate	Right	MSS	-3.72	-4.86	-4.08
41	male	59.1	Stage III	T3	N1	moderate	Left	MSS	-3.07	-3.27	-3.73
42	female	74.6	Stage II	T3	N0 ≥ N10 lymph nodes	poor	Right	MSS	-4.21	-5.62	-4.35
43	female	83.2	Stage II	T3	N0 ≥ N10 lymph nodes	moderate	Right	MSS	-3.83	-5.86	-4.01
44	male	58.9	Stage III	T2	N2	moderate	Right	MSS	-3.48	-3.92	-4.38
45	female	73.8	Stage II	T3	N0 ≥ N10 lymph nodes	moderate	Right	MSS	-3.9	-4.16	-4.55
46	male	70.7	Stage I	T2	N0 ≥ N10 lymph nodes	moderate	Left	MSS	-3.5	-3.07	-4.2
47	male	72.8	Stage III	T3	N1	moderate	Left	MSS	-4.05	-5.27	-4.64
48	female	68	Stage III	T3	N1	moderate	Left	MSS	-3.35	-4.29	-3.88
49	male	75.3	Stage III	T3	N1	moderate	Left	MSS	-4.1	-5.09	-5.01
50	male	76.5	Stage II	T3	N0 ≥ N10 lymph nodes	moderate	Left	MSS	-3.58	-5.09	-3.78
51	female	70	Stage III	T3	N2	moderate	Right	MSI	-4.72	-5.74	-5.21
52	male	66.3	Stage III	T3	N1	poor	Left	MSS	-3.82	-4.02	-4.8
53	male	66.2	Stage III	T3	N1	good	Left	MSS	-4.18	-4.96	-4.6
54	female	74.2	Stage II	T3	N0 ≥ N10 lymph nodes	moderate	Right	MSI	-4.96	-6.11	-5.07
55	male	72.5	Stage II	T3	N0 ≥ N10 lymph nodes	moderate	Left	MSS	-4.93	-5.54	-5.21
56	male	62.6	Stage II	T3	N0 ≥ N10 lymph nodes	moderate	Right	MSS	-3.17	-4.32	-3.67
57	female	62.6	Stage III	T2	N1	moderate	Left	MSS	-4.42	-5.3	-4.77
58	male	77.9	Stage II	T3	N0 < N10 lymph nodes	moderate	Left	MSS	-3.42	-3.85	-3.62
59	female	70.2	Stage III	T3	N1	good	Right	MSI	-4.16	-5.36	-4.29
60	male	80.2	Stage I	T2	N0 ≥ N10 lymph nodes	unknown	Right	MSS	-4.81	-5.82	-5.26
61	male	72.1	Stage I	T2	N0 ≥ N10 lymph nodes	moderate	Left	MSS	-4.62	-5.33	-5.21
62	male	65.3	Stage II	T3	N0 ≥ N10 lymph nodes	moderate	Right	MSI	-4.59	-5.44	-4.77
63	male	64.5	Stage III	T3	N1	poor	Right	MSS	-3.52	-4.46	-3.82
64	male	66.8	Stage I	T2	N0 ≥ N10 lymph nodes	moderate	Left	MSS	-3.61	-4.42	-4.15
65	female	69.9	Stage II	T3	N0 ≥ N10 lymph nodes	moderate	Left	MSS	-3.88	-4.07	-4.2
66	female	83.1	Stage I	T2	N0 < N10 lymph nodes	moderate	Right	MSS	-3.58	-4.28	-4
67	female	75.2	Stage III	T2	N1	unknown	Left	MSS	-3.55	-3.77	-4.46
68	female	61.3	Stage III	T3	N1	moderate	Left	MSS	-3.9	-4.59	-4.81
69	female	60.8	Stage I	T2	N0 ≥ N10 lymph nodes	moderate	Left	MSS	-3.94	-5.1	-4.17
70	female	73.9	Stage I	T2	N0 ≥ N10 lymph nodes	moderate	Right	MSS	-4.1	-3.97	-5.15
71	male	62.4	Stage I	T2	N0 ≥ N10 lymph nodes	moderate	Right	MSI	-5.18	-4.81	-5.72
72	male	74.2	Stage II	T3	N0 ≥ N10 lymph nodes	moderate	Left	MSS	-3.89	-4.64	-4.27
73	male	76.5	Stage II	T3	N0 ≥ N10 lymph nodes	moderate	Right	MSS	-3.95	-3.8	-4.48
74	female	64.9	Stage III	T3	N1	moderate	Left	MSS	-5.25	-6.07	-5.88
75	male	68.5	Stage II	T3	N0 < N10 lymph nodes	moderate	Left	MSS	-2.52	-3.26	-3.19
76	male	69	Stage III	T3	N2	moderate	Right	MSI	-4.82	-5.99	-5.32
77	male	64.2	Stage II	T3	N0 ≥ N10 lymph nodes	moderate	Right	MSI	-4.65	-4.79	-5.21
78	male	63.8	Stage III	T3	N1	moderate	Right	MSI	-4.4	-5.29	-5
79	male	60	Stage III	T3	N1	poor	Left	MSS	-4.01	-6.65	-4.39
80	female	65.5	Stage I	T2	N0 ≥ N10 lymph nodes	moderate	Left	MSS	-4.28	-4.36	-4.96
81	female	78.2	Stage I	T2	N0 ≥ N10 lymph nodes	moderate	Left	MSS	-4.6	-3.76	-4.55
82	male	61.9	Stage III	T3	N1	unknown	Right	MSI	-4.61	-5.71	-4.89
83	male	78.2	Stage II	T3	N0 ≥ N10 lymph nodes	moderate	Right	MSI	-5.08	-4.75	-5.62
84	female	58.7	Stage I	T2	N0 ≥ N10 lymph nodes	moderate	Left	MSS	-3.49	-2.97	-4.13
85	male	76.9	Stage II	T3	N0 ≥ N10 lymph nodes	good	Right	MSI	-3.58	-4.7	-3.95
86	female	81.5	Stage I	T2	N0 ≥ N10 lymph nodes	moderate	Left	MSS	-4.54	-5.11	-4.67
87	female	72	Stage II	T3	N0 ≥ N10 lymph nodes	moderate	Right	MSS	-4.69	-5.99	-4.85
88	female	55.4	Stage III	T2	N1	moderate	Left	MSS	-4.63	-5.95	-5.04
89	male	66.2	Stage II	T3	N0 < N10 lymph nodes	moderate	Right	MSS	-3.7	-4.3	-4.3
90	male	56	Stage III	T3	N1	moderate	Right	MSS	-4.5	-5.22	-5.57
91	male	68.2	Stage III	T3	N2	moderate	Left	MSS	-4.3	-5.42	-4.96
92	female	59.9	Stage I	T2	N0 ≥ N10 lymph nodes	moderate	Left	MSS	-4.4	-3.79	-5.82
93	male	69.5	Stage III	T3	N2	poor	Left	MSS	-4.17	-5.02	-4.69
94	female	70.2	Stage II	T3	N0 ≥ N10 lymph nodes	moderate	Right	MSI	-5.73	-5.78	-6.69
95	female	56.9	Stage II	T3	N0 ≥ N10 lymph nodes	moderate	Right	MSS	-4.59	-4.64	-5.25
96	male	67.8	Stage II	T3	N0 ≥ N10 lymph nodes	moderate	Left	MSS	-2.69	-3.5	-3.06
97	female	77	Stage III	T3	N2	poor	Left	MSS	-2.41	-3.13	-3.19
98	female	60.8	Stage II	T3	N0 ≥ N10 lymph nodes	moderate	Right	MSI	-4.23	-3.79	-4.81
99	male	78.6	Stage I	T2	N0 < N10 lymph nodes	moderate	Left	MSS	-5.25	-5.32	-5.82
100	male	76.1	Stage II	T3	N0 ≥ N10 lymph nodes	moderate	Left	MSS	-4.68	-4.33	-5.64
101	female	61.9	Stage I	T2	N0 ≥ N10 lymph nodes	moderate	Right	MSS	-3.97	-3.92	-4.48
102	male	64.7	Stage II	T3	N0 < N10 lymph nodes	moderate	Left	MSS	-2.36	-2.22	-3.92
103	female	57.3	Stage II	T3	N0 ≥ N10 lymph nodes	moderate	Right	MSS	-4.6	-4.9	-5.17
104	male	77.7	Stage III	T3	N1	moderate	Right	MSS	-3.77	-3.84	-5.02
105	male	73.7	Stage II	T3	N0 ≥ N10 lymph nodes	moderate	Right	MSS	-4.06	-4.61	-4.78
106	male	78.7	Stage II	T3	N0 ≥ N10 lymph nodes	moderate	Right	MSS	-4.24	-4.22	-4.84
107	female	76.8	Stage II	T3	N0 ≥ N10 lymph nodes	moderate	Left	MSS	-3.97	-4.26	-4.28
108	female	77.3	Stage II	T3	N0 < N10 lymph nodes	moderate	Right	MSS	-3.09	-3.77	-3.78
109	male	56.5	Stage III	T2	N1	poor	Left	MSS	-3.76	-4.33	-4.88
110	female	68.9	Stage I	T2	N0 ≥ N10 lymph nodes	moderate	Right	MSI	-4.91	-6.35	-4.68
111	male	74	Stage II	T3	N0 ≥ N10 lymph nodes	moderate	Right	MSS	-3.62	-4.08	-4.3
112	female	57.1	Stage II	T3	N0 < N10 lymph nodes	moderate	Left	MSS	-4.76	-4.73	-5.39
113	female	71	Stage II	T3	N0 ≥ N10 lymph nodes	moderate	Right	MSS	-3.93	-3.47	-5.27
114	male	68.6	Stage II	T3	N0 ≥ N10 lymph nodes	good	Right	MSS	-3.38	-3.73	-4.31
115	male	69.7	Stage III	T3	N2	moderate	Left	MSS	-3.37	-3.82	-4.21
116	female	70.5	Stage II	T3	N0 ≥ N10 lymph nodes	good	Right	MSI	-4.57	-6.07	-4.83
117	female	71.9	Stage I	T2	N0 ≥ N10 lymph nodes	moderate	Left	MSS	-4.44	-4.17	-5.3
118	female	79.4	Stage I	T2	N0 < N10 lymph nodes	moderate	Right	MSI	-5.19	-5.48	-5.85
119	female	61.4	Stage II	T3	N0 ≥ N10 lymph nodes	moderate	Left	MSI	-4.48	-5.43	-4.54
120	male	69.5	Stage I	T2	N0 ≥ N10 lymph nodes	moderate	Left	MSS	-3.83	-4.12	-4.58
121	male	84.3	Stage I	T2	N0 < N10 lymph nodes	moderate	Right	MSI	-4.12	-4.29	-4.68
122	male	81.8	Stage III	T3	N2	moderate	Right	MSS	-4.17	-4.47	-5.19
123	male	75.2	Stage I	T2	N0 ≥ N10 lymph nodes	unknown	Left	MSS	-3.53	-3.93	-3.97
124	male	58	Stage II	T3	N0 ≥ N10 lymph nodes	unknown	Left	MSI	-4.2	-4.68	-4.49
125	female	74.7	Stage II	T3	N0 ≥ N10 lymph nodes	good	Right	MSS	-3.36	-4.08	-3.41
126	female	63.7	Stage II	T3	N0 ≥ N10 lymph nodes	moderate	Left	MSS	-2.94	-3.07	-3.78
127	female	76.5	Stage II	T3	N0 ≥ N10 lymph nodes	moderate	Left	MSS	-4.39	-5.02	-4.81
128	female	80.9	Stage I	T2	N0 ≥ N10 lymph nodes	moderate	Right	MSI	-4.42	-4.31	-4.84
129	male	72.7	Stage III	T3	N2	unknown	Right	MSI	-4.63	-7.12	-4.19
130	female	71.7	Stage I	T2	N0 ≥ N10 lymph nodes	moderate	Right	MSS	-5.38	-5.91	-5.48
131	male	55.3	Stage II	T3	N0 ≥ N10 lymph nodes	moderate	Right	MSI	-5.13	-5.53	-5.54
132	female	74.5	Stage II	T3	N0 ≥ N10 lymph nodes	good	Right	MSS	-4.08	-4.21	-4.58
133	male	63.1	Stage III	T3	N1	poor	Right	MSI	-4.28	-4.89	-5.25
134	male	76.7	Stage III	T3	N2	poor	Left	MSS	-4.14	-5.08	-4.19
135	female	84.9	Stage II	T3	N0 ≥ N10 lymph nodes	moderate	Right	MSI	-5.48	-6.87	-5.12
136	female	73.6	Stage II	T3	N0 < N10 lymph nodes	moderate	Left	MSS	-5.39	-7.33	-5.45
137	female	62.1	Stage II	T3	N0 ≥ N10 lymph nodes	moderate	Left	MSI	-3.72	-4.4	-4.16
138	female	72.1	Stage III	T3	N1	good	Left	MSS	-3.86	-4.17	-4.68
139	male	73.1	Stage II	T3	N0 ≥ N10 lymph nodes	moderate	Right	MSS	-3.98	-4.28	-4.59
140	male	67.6	Stage II	T3	N0 ≥ N10 lymph nodes	moderate	Left	MSS	-2.22	-2.81	-2.87
141	male	82.9	Stage I	T2	N0 < N10 lymph nodes	moderate	Right	MSS	-3.31	-3.95	-3.89
142	female	62.4	Stage III	T3	N1	poor	Right	MSI	-5.13	-6.76	-5.36
143	male	63	Stage III	T3	N1	moderate	Right	MSS	-4.16	-4.59	-5.65
144	male	60.8	Stage III	T3	N1	moderate	Right	MSS	-4.71	-5.04	-5.53
145	female	65.8	Stage III	T3	N2	moderate	Right	MSS	-4.43	-7.74	-4.81
146	male	69.7	Stage I	T2	N0 < N10 lymph nodes	moderate	Left		-3.81	-3.52	-4.7
147	female	64	Stage I	T2	N0 ≥ N10 lymph nodes	moderate	Left	MSS	-4.78	-4.79	-5.4
148	female	59.9	Stage III	T3	N1	moderate	Left	MSS	-3.37	-3.97	-4.28
149	male	60.3	Stage III	T3	N2	moderate	Right	MSS	-3.32	-3.36	-4.32
150	male	81.4	Stage II	T3	N0 ≥ N10 lymph nodes	moderate	Right	MSS	-4.3	-4.92	-5
151	female	67.6	Stage III	T2	N1	moderate	Left	MSS	-4.24	-4.26	-5.71
152	female	60.9	Stage I	T2	N0 ≥ N10 lymph nodes	moderate	Left	MSS	-4.08	-4.52	-4.63
153	male	72	Stage II	T3	N0 < N10 lymph nodes	moderate	Left	MSS	-3.8	-4.33	-4.55
154	male	84.1	Stage I	T2	N0 < N10 lymph nodes	good	Right	MSI	-5.51	-5.6	-6.03
155	female	69.4	Stage II	T3	N0 ≥ N10 lymph nodes	poor	Left	MSS	-4.07	-4.47	-4.75
156	male	72.6	Stage III	T3	N1	moderate	Left	MSS	-3.62	-4.26	-4.5
157	male	63.8	Stage III	T3	N2	moderate	Right	MSS	-5.15	-8.16	-5.55
158	male	63	Stage III	T3	N1	moderate	Right	MSS	-3.71	-6.11	-4.37
159	female	67.7	Stage III	T2	N1	moderate	Right	MSI	-4.56	-5.01	-5.46
160	female	79.5	Stage II	T3	N0 ≥ N10 lymph nodes	moderate	Left	MSS	-4.89	-5.59	-4.66
161	female	56	Stage II	T3	N0 ≥ N10 lymph nodes	moderate	Left	MSS	-3.75	-4.29	-4.07
162	male	57	Stage II	T3	N0 ≥ N10 lymph nodes	moderate	Right	MSS	-3.53	-4.27	-3.8
163	male	63.1	Stage II	T3	N0 ≥ N10 lymph nodes	moderate	Left	MSS	-3.15	-3.31	-3.96
164	female	61.7	Stage II	T3	N0 ≥ N10 lymph nodes	moderate	Left	MSS	-3.48	-3.1	-4.81
165	female	79.6	Stage II	T3	N0 ≥ N10 lymph nodes	moderate	Left	MSS	-4.47	-4.97	-4.99
166	female	57.9	Stage III	T3	N1	moderate	Left	MSS	-3.54	-4.68	-4.31
167	male	62.9	Stage I	T2	N0 ≥ N10 lymph nodes	moderate	Left	MSS	-4.47	-4.29	-5.25
168	male	64.8	Stage II	T3	N0 ≥ N10 lymph nodes	moderate	Right	MSS	-2.77	-4.15	-2.89
169	female	82.1	Stage II	T3	N0 ≥ N10 lymph nodes	poor	Right	MSI	-3.73	-4.42	-4.04
170	male	57.6	Stage I	T2	N0 < N10 lymph nodes	moderate	Left	MSS	-3.13	-3.62	-3.54
171	female	70.2	Stage II	T3	N0 ≥ N10 lymph nodes	moderate	Left	MSS	-4.25	-4.38	-4.62
172	male	60.4	Stage II	T3	N0 ≥ N10 lymph nodes	moderate	Left	MSI	-4.36	-5.31	-4.47
173	male	60.6	Stage II	T3	N0 ≥ N10 lymph nodes	moderate	Left	MSS	-4.65	-4.61	-5.97
174	male	59.4	Stage II	T3	N0 ≥ N10 lymph nodes	poor	Right	MSI	-4.81	-5.95	-5.29
175	female	63.9	Stage III	T3	N2	moderate	Left	MSS	-3.95	-5.14	-4.31
176	male	68.2	Stage I	T2	N0 ≥ N10 lymph nodes	moderate	Left	MSS	-4.55	-4.05	-5.53
177	male	60.9	Stage I	T2	N0 < N10 lymph nodes	moderate	Right	MSS	-3.42	-3.31	-4.27
178	female	64.7	Stage III	T3	N1	moderate	Left	MSS	-3.71	-4.85	-3.91
179	female	76.4	Stage III	T3	N2	moderate	Left	MSS	-4.6	-6.03	-5.12
180	female	69.4	Stage II	T3	N0 ≥ N10 lymph nodes	poor	Right	MSI	-3.79	-5.42	-3.84
181	female	77.9	Stage I	T2	N0 ≥ N10 lymph nodes	moderate	Left	MSS	-4.32	-5.08	-4.57
182	male	60.8	Stage II	T3	N0 ≥ N10 lymph nodes	moderate	Right	MSS	-4.36	-4.63	-4.81
183	female	66.1	Stage III	T3	N1	moderate	Right	MSI	-4.29	-5.3	-5.17
184	female	55.7	Stage II	T3	N0 ≥ N10 lymph nodes	good	Left	MSS	-4.05	-5.82	-4.04
185	male	66.1	Stage II	T3	N0 < N10 lymph nodes	moderate	Left	MSS	-3.46	-4.23	-3.8
186	male	77	Stage I	T2	N0 ≥ N10 lymph nodes	moderate	Left	MSS	-4.46	-4.85	-5.21
187	female	85.5	Stage II	T3	N0 ≥ N10 lymph nodes	moderate	Right	MSI	-4.8	-5.34	-5.21
188	female	82.8	Stage I	T2	N0 ≥ N10 lymph nodes	moderate	Right	MSI	-4.96	-6.1	-5.33
189	male	61.3	Stage I	T2	N0 ≥ N10 lymph nodes	moderate	Left	MSS	-4.8	-7.24	-4.76
190	male	65.4	Stage II	T3	N0 ≥ N10 lymph nodes	moderate	Left	MSS	-3.9	-4.54	-4.14
191	male	79.7	Stage II	T3	N0 ≥ N10 lymph nodes	moderate	Right	MSS	-3.07	-3.44	-3.65
192	female	65.5	Stage II	T3	N0 ≥ N10 lymph nodes	moderate	Right	MSS	-5.06	-5.56	-5.14
193	female	56.1	Stage III	T3	N2	moderate	Right	MSS	-3.61	-4.03	-5.09
194	male	80.6	Stage II	T3	N0 ≥ N10 lymph nodes	moderate	Right	MSS	-4.38	-4.79	-5.14
195	male	80.2	Stage II	T3	N0 ≥ N10 lymph nodes	moderate	Right	MSS	-3.33	-5.97	-3.53
196	male	63.9	Stage III	T3	N1	moderate	Right	MSS	-4.09	-6.44	-4.73
197	male	57.7	Stage I	T2	N0 ≥ N10 lymph nodes	moderate	Left	MSS	-4.24	-5.33	-4.29
198	female	85.2	Stage II	T3	N0 ≥ N10 lymph nodes	moderate	Right	MSI	-4.28	-4.71	-5.05
199	female	70.7	Stage II	T3	N0 ≥ N10 lymph nodes	moderate	Right	MSS	-3.75	-4.84	-4.06
200	male	68.6	Stage II	T3	N0 ≥ N10 lymph nodes	good	Left	MSS	-3.85	-3.82	-4.59
201	male	74.7	Stage III	T3	N1	moderate	Right	MSS	-5.17	-6.38	-5.86
202	male	63.2	Stage III	T3	N1	moderate	Left	MSS	-3.15	-4.26	-3.71
203	male	80.4	Stage I	T2	N0 ≥ N10 lymph nodes	moderate	Right	MSI	-5.33	-5.15	-5.99
204	male	70.6	Stage II	T3	N0 ≥ N10 lymph nodes	moderate	Left	MSS	-3.25	-4.63	-3.44
205	female	68.3	Stage II	T3	N0 ≥ N10 lymph nodes	moderate	Left	MSS	-3.63	-4.26	-4.01
206	female	72.7	Stage I	T2	N0 ≥ N10 lymph nodes	good	Right	MSS	-2.82	-3.25	-3.02
207	male	81.6	Stage I	T2	N0 < N10 lymph nodes	moderate	Right	MSS	-3.59	-5.14	-3.74
208	female	61.4	Stage III	T3	N1	moderate	Right	MSS	-5.01	-5.66	-5.94
209	male	79	Stage I	T2	N0 ≥ N10 lymph nodes	moderate	Right	MSI	-4.93	-4.98	-5.52
210	male	67.5	Stage I	T2	N0 ≥ N10 lymph nodes	moderate	Left	MSS	-3.35	-3.69	-3.77
211	female	64.3	Stage II	T3	N0 ≥ N10 lymph nodes	moderate	Right	MSI	-2.87	-5.32	-3.11
212	male	63.3	Stage III	T3	N1	moderate	Left	MSS	-4.02	-4.54	-4.91
213	female	73.3	Stage I	T2	N0 ≥ N10 lymph nodes	moderate	Right	MSS	-4.02	-4.24	-4.87
214	male	60.9	Stage I	T2	N0 < N10 lymph nodes	moderate	Left	MSS	-4.72	-5.21	-4.93
215	male	73.2	Stage II	T3	N0 ≥ N10 lymph nodes	moderate	Right	MSS	-4.08	-3.58	-5.05
216	female	67.4	Stage II	T3	N0 ≥ N10 lymph nodes	moderate	Right	MSS	-5.15	-5.86	-5.29
217	male	64.8	Stage III	T3	N1	moderate	Left	MSS	-2.78	-3.05	-3.78
218	female	68.7	Stage II	T3	N0 ≥ N10 lymph nodes	moderate	Right	MSI	-5.28	-5.43	-5.72
219	female	74.9	Stage I	T2	N0 ≥ N10 lymph nodes	moderate	Right	MSI	-4.85	-4.89	-5.68
220	male	65.7	Stage III	T3	N1	moderate	Left	MSS	-3.87	-6.15	-4.13
221	male	59.4	Stage I	T2	N0 ≥ N10 lymph nodes	good	Right	MSS	-3.42	-5.05	-3.13
222	female	76.2	Stage I	T2	N0 < N10 lymph nodes	moderate	Left	MSS	-4.47	-4.71	-4.77
223	female	65.5	Stage II	T3	N0 ≥ N10 lymph nodes	moderate	Left	MSS	-3.66	-3.96	-3.99
224	female	77.5	Stage II	T3	N0 ≥ N10 lymph nodes	moderate	Left	MSS	-3.91	-4.29	-4.28
225	male	80.9	Stage II	T3	N0 ≥ N10 lymph nodes	moderate	Right	MSS	-3.26	-3.62	-3.96
226	female	74.5	Stage III	T3	N1	moderate	Left	MSS	-4.65	-6.06	-4.72
227	male	68.9	Stage I	T2	N0 ≥ N10 lymph nodes	good	Left	MSS	-3.63	-3.51	-4.78
228	male	65.6	Stage II	T3	N0 ≥ N10 lymph nodes	moderate	Left	MSS	-2.07	-2.53	-2.38
229	female	67.6	Stage I	T2	N0 ≥ N10 lymph nodes	moderate	Right	MSS	-2.62	-3.93	-3.34
230	male	55.8	Stage II	T3	N0 ≥ N10 lymph nodes	moderate	Left	MSS	-3.07	-3.79	-3.54
231	male	75.9	Stage I	T2	N0 < N10 lymph nodes	good	Left	MSS	-5.06	-5.26	-5.42
232	female	66.7	Stage III	T3	N2	good	Right	MSS	-2.2	-3.2	-2.65
233	female	61.5	Stage III	T2	N1	moderate	Right	MSS	-4.74	-5.26	-5.7
234	male	58.4	Stage III	T3	N2	good	Left	MSS	-4.46	-4.52	-5.19
235	female	70.4	Stage III	T3	N1	unknown	Right	MSS	-3.15	-3.66	-3.57
236	female	66.7	Stage I	T2	N0 ≥ N10 lymph nodes	moderate	Right	MSS	-3.92	-4.14	-4.59
237	male	67.6	Stage III	T3	N1	moderate	Left	MSS	-3.42	-3.79	-4.65
238	male	60.5	Stage III	T3	N2	good	Left	MSS	-4.34	-5.23	-5.01
239	female	71.3	Stage III	T3	N2	moderate	Right	MSS	-4.58	-5.25	-5.42
240	male	67.2	Stage III	T3	N1	moderate	Right	MSS	-5.05	-6.7	-5.63
